# Supplementary material for: Morphological Analysis of Poly(4,4′-oxydiphenylene-pyromellitimide)-Based Organic Solvent Nanofiltration Membranes Formed by the Solution Method
Source: MDPI journal article supplement (doi:10.3390/membranes12121235), 2022-12-07
Supplement: s1 [file s1]

## Supplementary Material

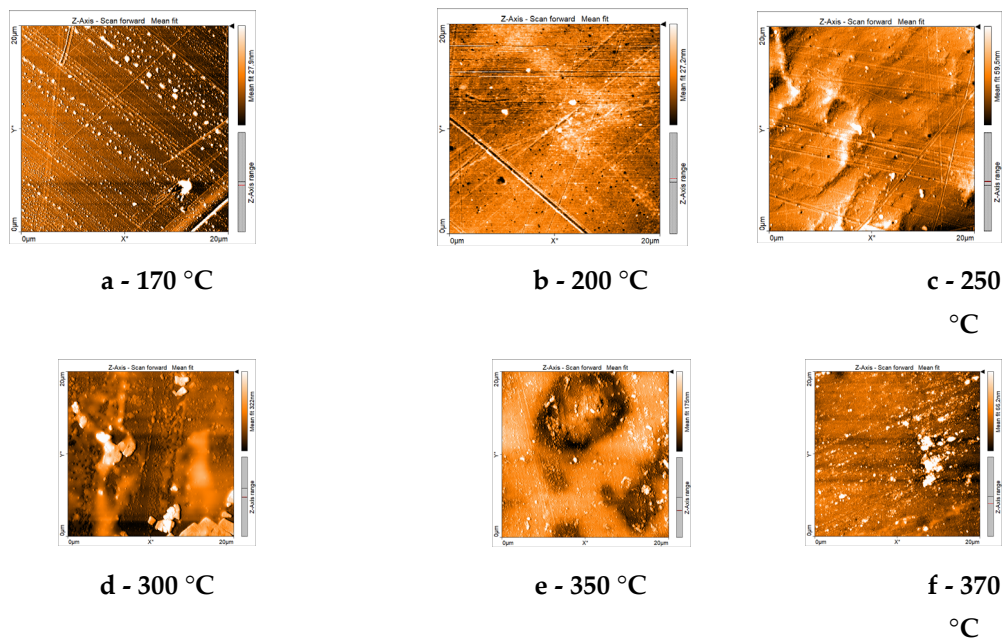

**Figure S1.** AFM images of free surface of PUI copolymer at different stages of warming (a) -170°C, (b)-200°C, (c)-250°C, (d)-300°C, (e)- 350°C (f)-370°C, in topography mode; the scanning matrix is  $20 \times 20 \mu\text{m}$ .

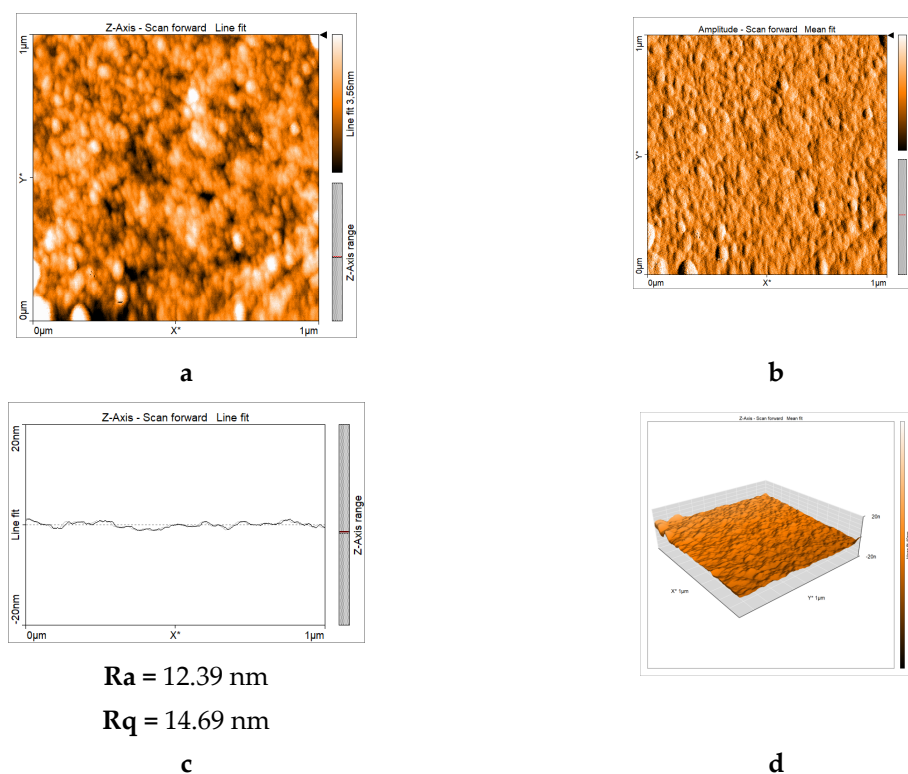

**Figure S2.** AFM images of free surface of PUI copolymer film heated at °C, in topography mode (a), amplitudes (b), profile of the selected surface area (c), 3D-image (d).

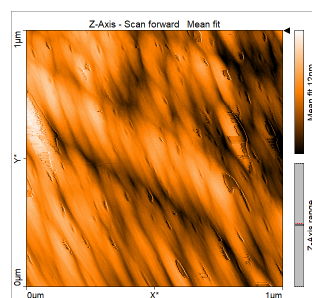

**a**

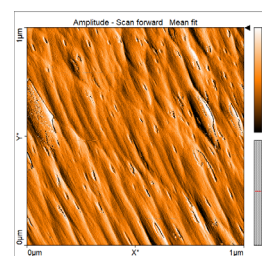

**b**

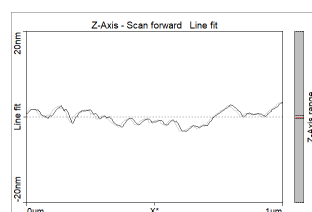

$$Ra = 49.23 \text{ nm}$$

$$Rq = 57.70 \text{ nm}$$

**c**

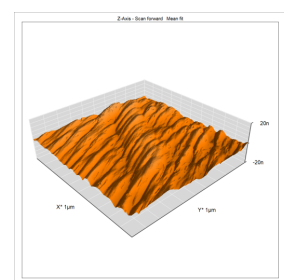

**d**

**Figure S3.** AFM images of free surface of PUI copolymer film heated at 250°C (sample No. 1), in topography mode (a), amplitudes (b), profile of the selected surface area (c), 3D-image (d).

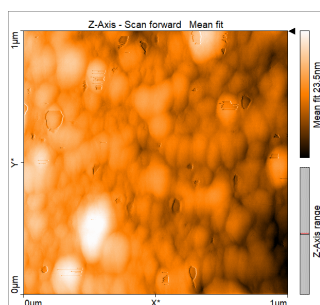

**a**

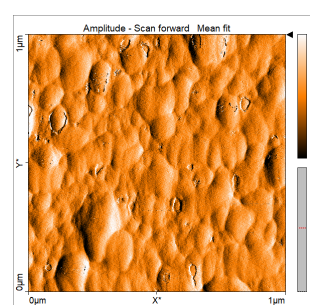

**b**

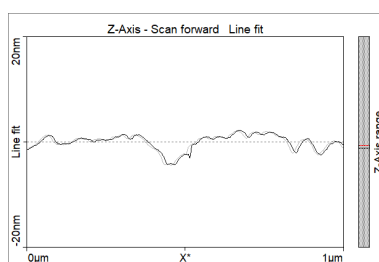

$$Ra = 11.60 \text{ nm}$$

$$Rq = 18.05 \text{ nm}$$

**c**

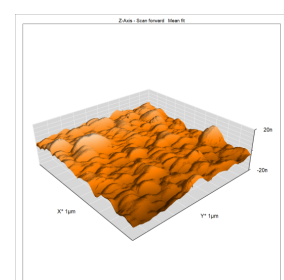

**d**

**Figure S4.** AFM images of free surface of PUI copolymer film heated at °C (sample No. 1), in topography mode (a), amplitudes (b), profile of the selected surface area (c), 3D-image (d).

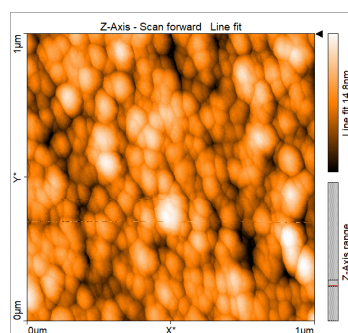

**a**

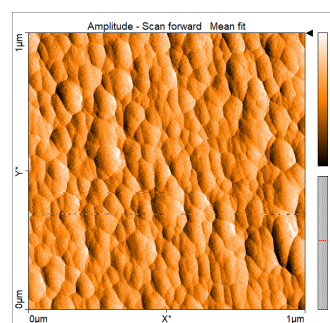

**b**

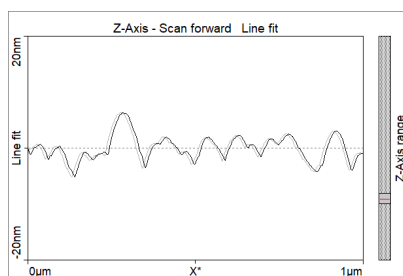

**Ra = 130.18 nm**

**Rq = 150.85 nm**

**c**

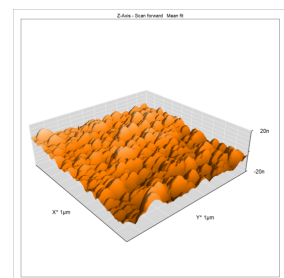

**d**

**Figure S5.** AFM images of free surface of PUI copolymer film heated at 350°C (sample No. 1), in topography mode (a), amplitudes (b), profile of the selected surface area (c), 3D-image (d).

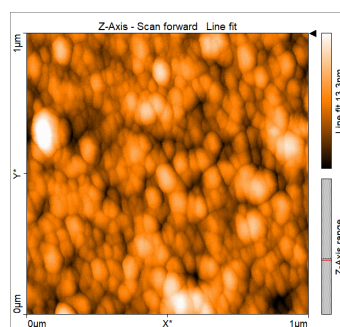

**a**

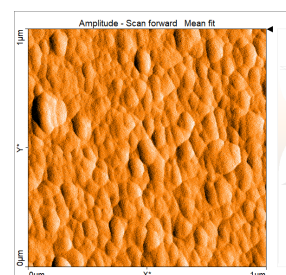

**b**

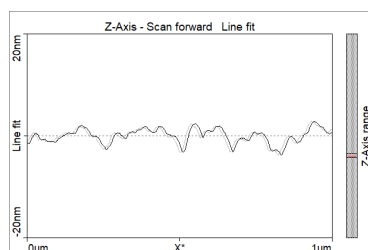

**Ra = 46.85 nm**

**Rq = 55.19 nm**

**c**

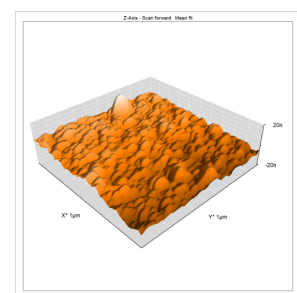

**d**

**Figure S6.** AFM images of free surface of PUI copolymer film heated at 370°C (sample No. 1), in topography mode (a), amplitudes (b), profile of the selected surface area (c), 3D-image (d).

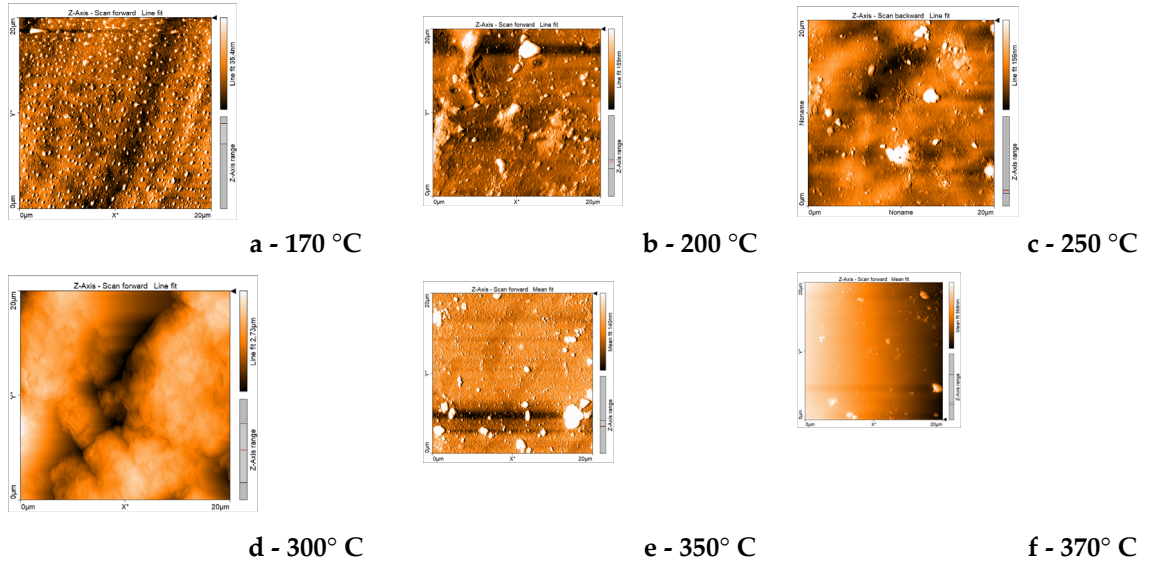

**Figure S7.** AFM images of free surface of *PUI2* copolymer at different stages of warming (a) -170°C, (b)-200°C, (c)-250°C, (d)-300°C, (e)- 350°C (f)-370°C, in topography mode; the scanning matrix is 20 × 20 μm.

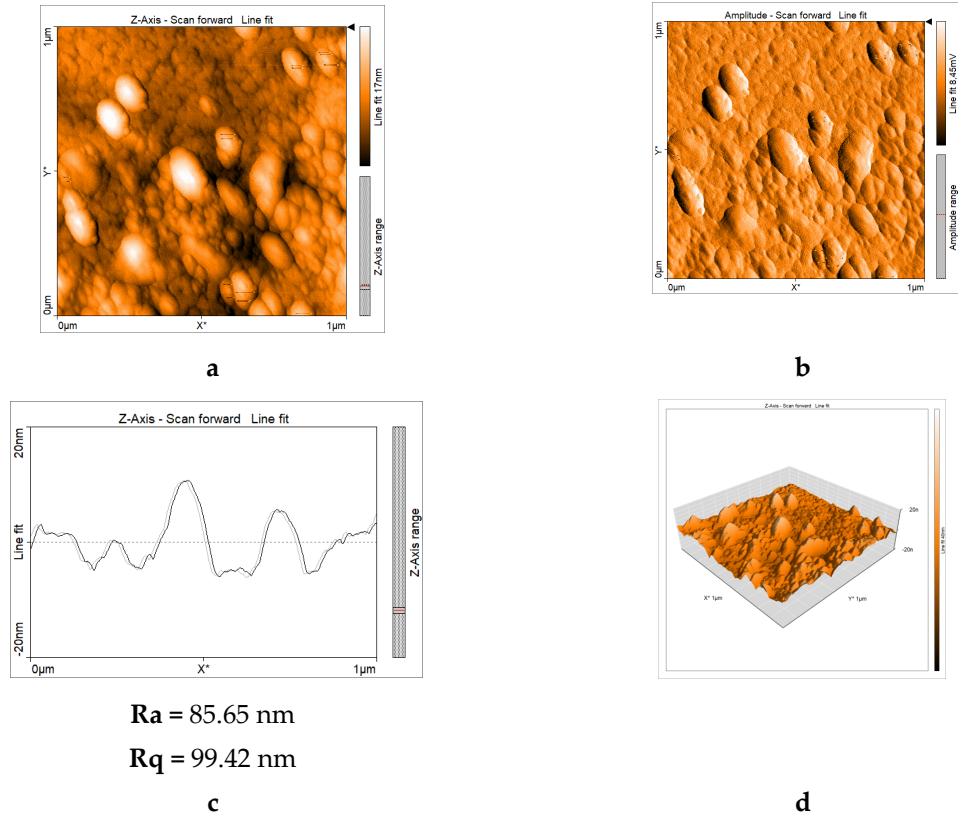

**Figure S8.** AFM images of free surface of *PUI2* copolymer film heated at 250°C (sample No. 2), in topography mode (a), amplitudes (b), profile of the selected surface area (c), 3D-image (d).



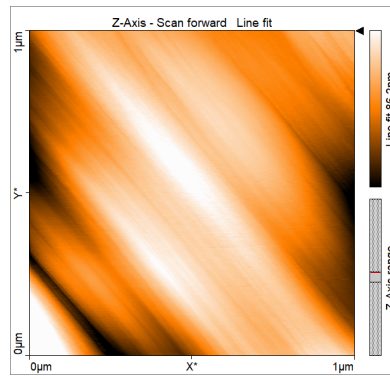

**a**

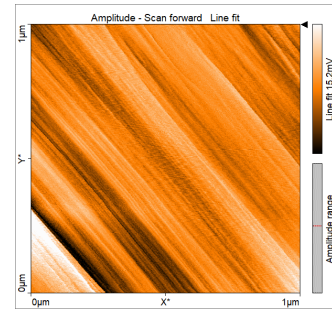

**b**

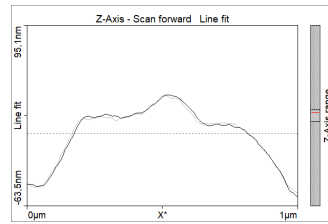

**Ra** = 140.44 nm

**Rq** = 167.54 nm

**c**

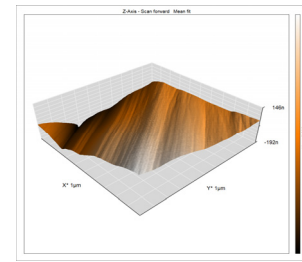

**d**

**Figure S9.** AFM images of free surface of *PUI2* copolymer film heated at 300°C (sample No. 2), in topography mode (a), amplitudes (b), profile of the selected surface area (c), 3D-image (d).

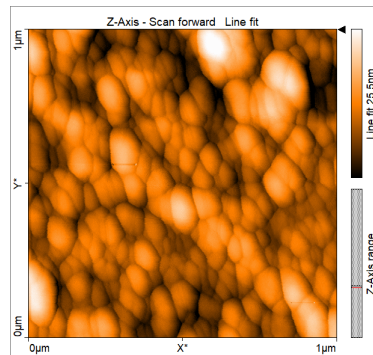

**a**

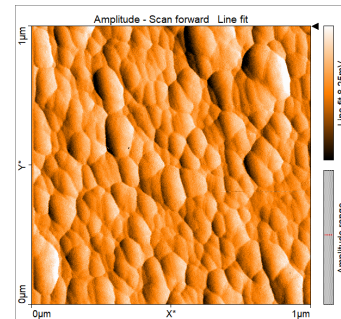

**b**

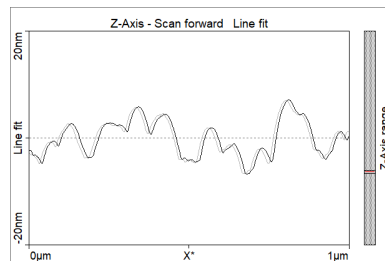

**Ra** = 42.56 nm

**Rq** = 48.31 nm

**c**

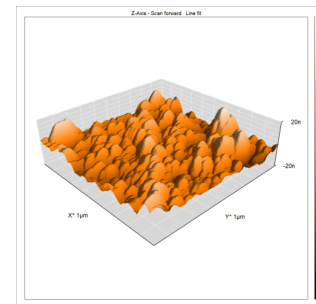

**d**

**Figure S10.** AFM images of free surface of *PUI2* copolymer film heated at 350°C (sample No. 2), in topography mode (a), amplitudes (b), profile of the selected surface area (c), 3D-image (d).

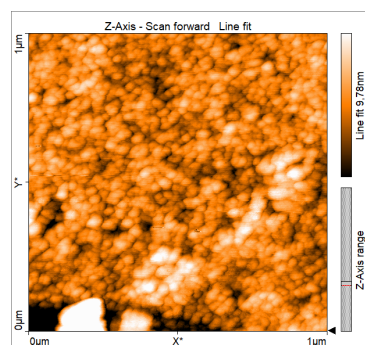

a

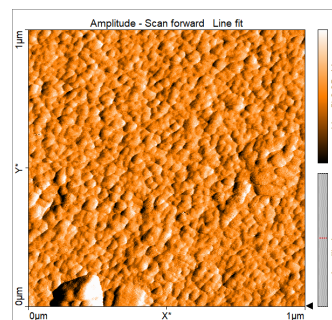

b

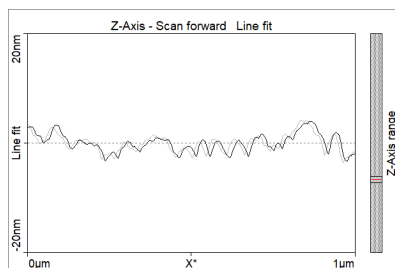

c

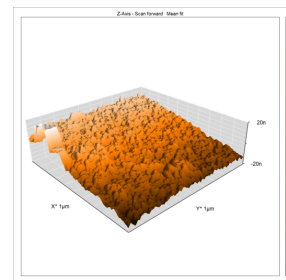

d

$Ra = 75.96 \text{ nm}$

$Rq = 92.90 \text{ nm}$

**Figure S11.** AFM images of free surface of *PUI2* copolymer film heated at 370°C (sample No. 2), in topography mode (a), amplitudes (b), profile of the selected surface area (c), 3D-image (d).

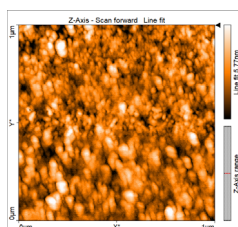

a

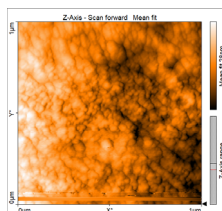

b

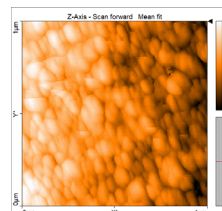

c

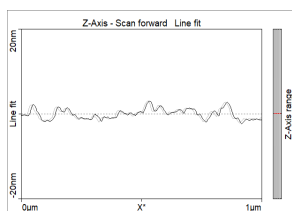

d

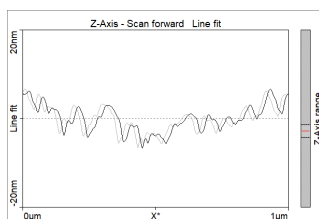

e

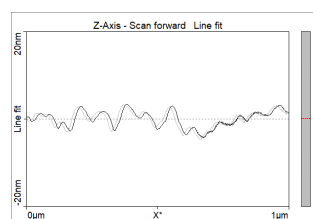

f

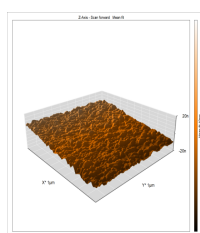

$Ra = 9.699 \text{ nm}$   
 $Rq = 11.349 \text{ nm}$

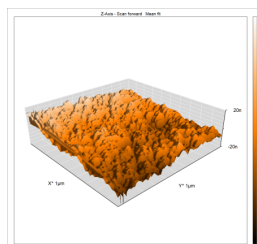

$Ra = 20.56 \text{ nm}$   
 $Rq = 23.01 \text{ nm}$

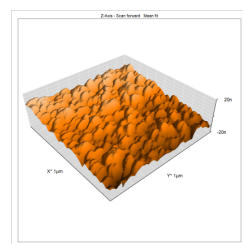

$Ra = 4.39 \text{ nm}$   
 $Rq = 5.177 \text{ nm}$

g

h

i

**Figure S12.** AFM images of the free surface of the *PUI* polymer film subjected to hydrolysis by various mixtures after heating: topography (a), profile of the selected surface area (d), 3D-image (g), hydrolysis by composition I (a mixture of hydrochloric and acetic acids in a ratio of 10:90); topography (b), profile of the selected surface area (e), 3D-image (h), hydrolysis by composition II (a mixture of hydrochloric and acetic acids in a ratio of 90:10); topography (c), profile of the selected surface area (f), 3D-image (i), hydrolysis by composition III (a mixture of  $\text{CF}_3\text{COOH} + \text{H}_2\text{O}$  in a ratio of 50:50).

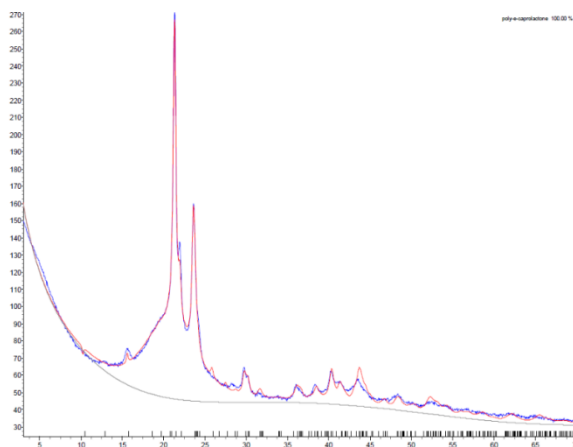

**Figure S13.** Polycaprolactone diffractogram.

IR studies of thermalized films.

The polyurethaneimide films from which the membranes were formed were examined by infrared spectroscopy. The IR spectrum of poly(urethane-imides) thermalized at various temperatures (170°C, 300°C, 350 °C) is shown in Figure 14. Valence N-H vibrations of the urethane fragment are found in the range of wave numbers: 3310-3450  $\text{cm}^{-1}$ , a slight broadening of which is probably due to the participation of N-H in formation of hydrogen bonds. The bands having low intensity and found in the range of 3040-3090  $\text{cm}^{-1}$  can be attributed to valence C-H vibrations of aromatic fragments of diamines and dianhydrides. While for aliphatic fragments, bands of valence C-H oscillations were found in the region of 2870-2990  $\text{cm}^{-1}$ . The presence of the imide cycle is indicated by the presence of several bands: low intensity bands at 1777 and high intensity bands at 1721  $\text{cm}^{-1}$ , which are usually attributed to asymmetric and symmetric C = O oscillations of the imide cycle. The band of symmetrical C = O vibrations of the imide cycle partially overlaps with the bands of C = O vibrations of the caprolactone and urethane fragments, the latter of which manifests itself as a shoulder at 1620  $\text{cm}^{-1}$  and this indicates its participation in the formation of hydrogen bonds.

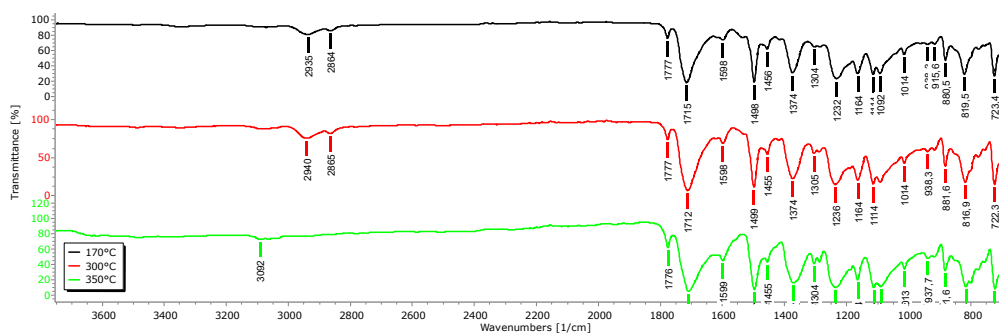

**Figure S14.** IR spectrum of polyurethane-imide film thermalized at 170°C, 300°C and 350°C.

As a result of thermolysis of poly (urethane imide) at high temperatures (350°C), a partial destruction of the aliphatic block occurs, which manifests itself in the IR spectra of thermalized samples in the form of a change in the intensity of a number of their bands. Namely, there are no bands in the region of 2941 and 2865  $\text{cm}^{-1}$  and corresponding to the C-H fluctuations of aliphatic groups. It should also be noted a significant decrease in the intensity of the bands with = Iso vibrations of the urethane fragment at 1620 and 1164  $\text{cm}^{-1}$ , respectively.
